# Supplementary material for: Insights into the catalytic reduction of organic dyes and antibacterial activity of graphene oxide supported mono and bimetallic nanocomposites
Source: Royal Society of Chemistry journal article supplement (doi:10.1039/c6nj03467e), 2017-01-01
Supplement: c6nj03467e1.pdf [file c6nj03467e1.pdf]

## Insights into the catalytic reduction of organic dyes and antibacterial activities of graphene oxide supported mono and bimetallic nanocomposites

K. Sivaranjan<sup>1</sup>, P. Vanitha<sup>1</sup>, A. Sathiyaseelan<sup>2</sup>, P. T. Kalaichelvan<sup>2</sup>, M. Sathuvan<sup>3</sup>,  
R. Rengasamy<sup>3</sup> and J. Santhanalakshmi<sup>1\*</sup>

<sup>1</sup>Department of Physical Chemistry, University of Madras, Guindy Campus,  
Chennai-600025, Tamilnadu, India

<sup>2,3</sup>Centre for Advanced Studies in Botany, University of Madras, Guindy Campus,  
Chennai-600025, Tamilnadu, India

\*E-mail: [kksivaranjan@gmail.com](mailto:kksivaranjan@gmail.com) and [drjslakshmi06@yahoo.co.in](mailto:drjslakshmi06@yahoo.co.in)

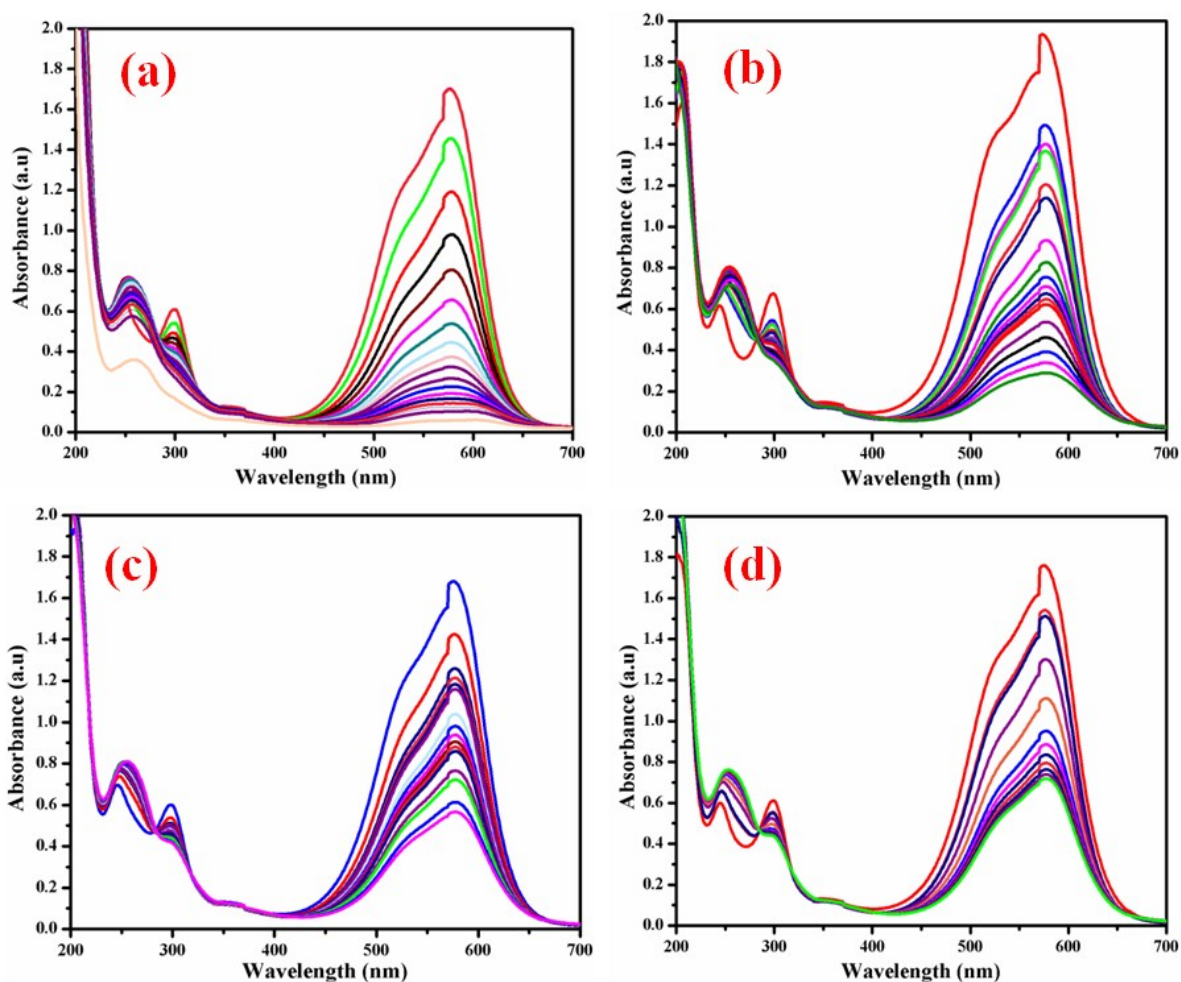

**Fig. 1** Catalytic reduction of CV using (a) GO/Ru-Pd (b) GO/Ag (c) GO/Pd and (d) GO/Ru NCs in the presence of NaBH<sub>4</sub> in aqueous medium.

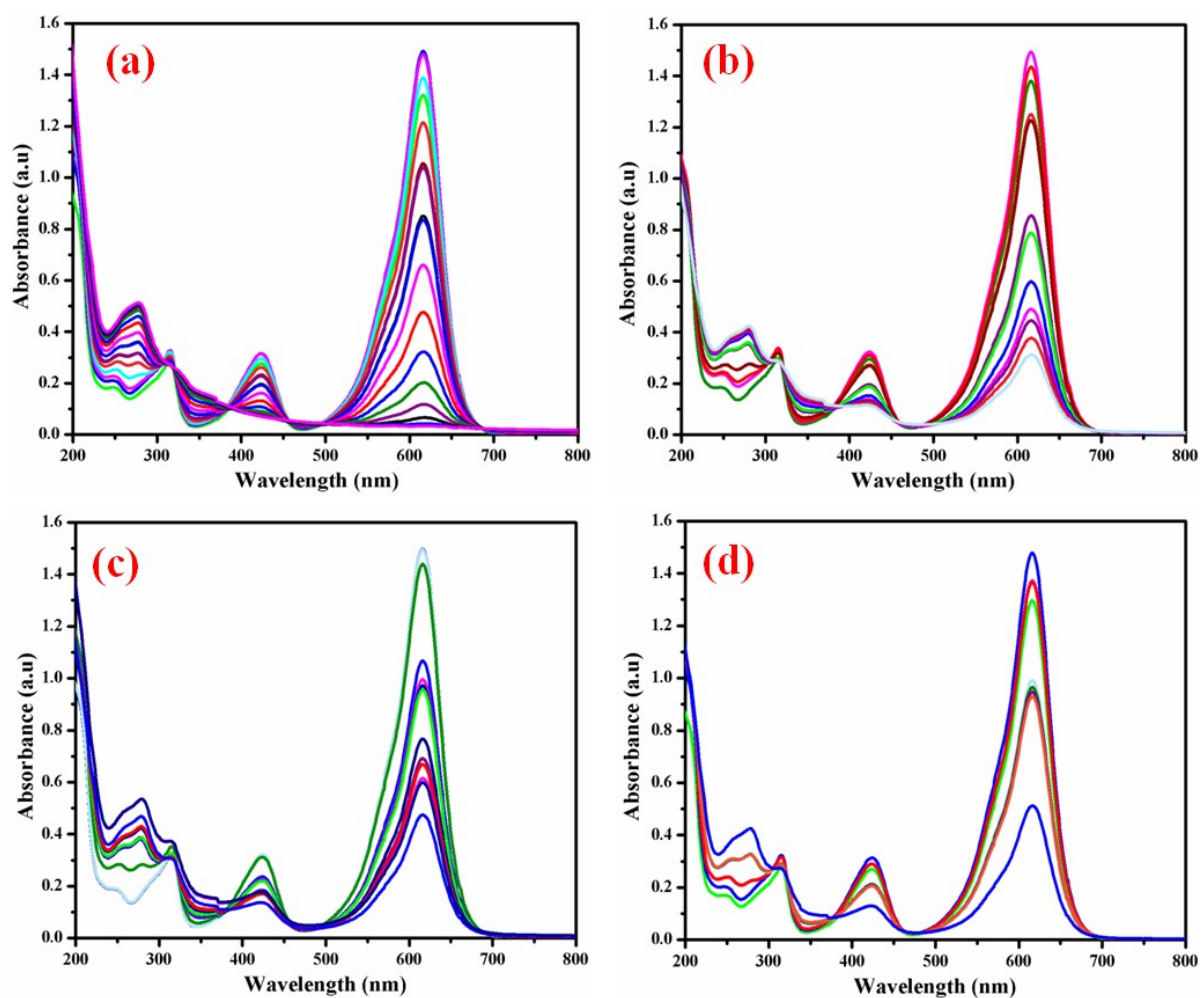

**Fig. 2** Catalytic reduction of MG using (a) GO/Ru-Pd (b) GO/Ag (c) GO/Pd and (d) GO/Ru NCs in the presence of NaBH<sub>4</sub> in aqueous medium.

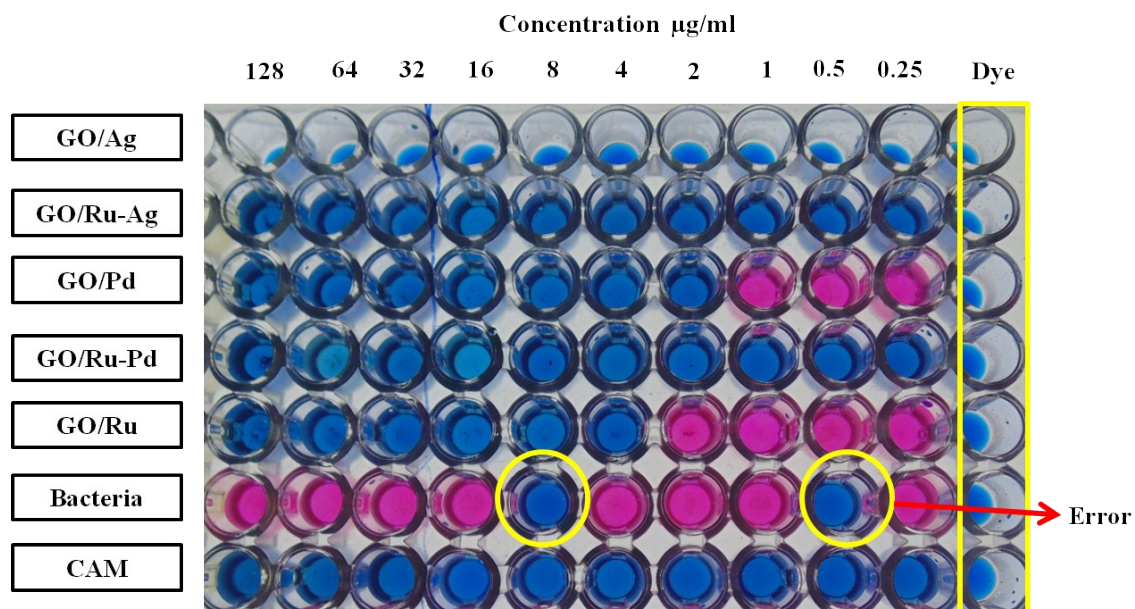

**Fig. 3 Photograph of the Minimum Inhibitory Concentration of GO supported mono and bimetallic NCs against *B. Subtilis***

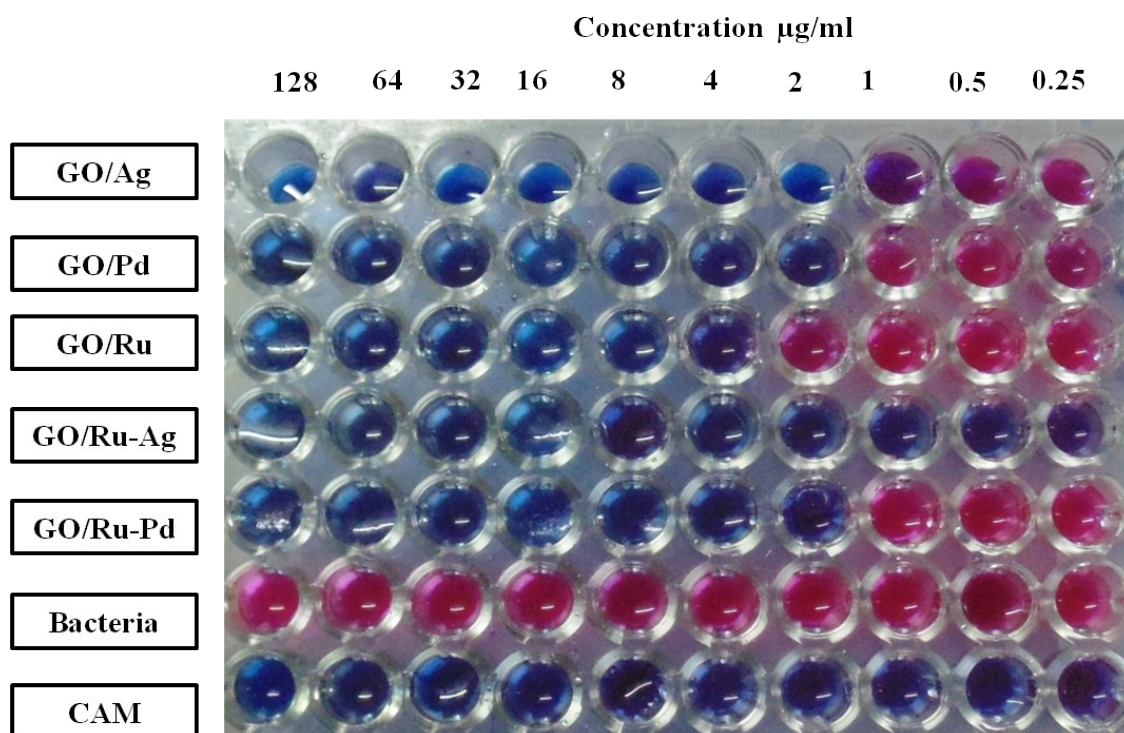

**Fig. 4 Photograph of the Minimum Inhibitory Concentration of GO supported mono and bimetallic NCs against *S. aureus***



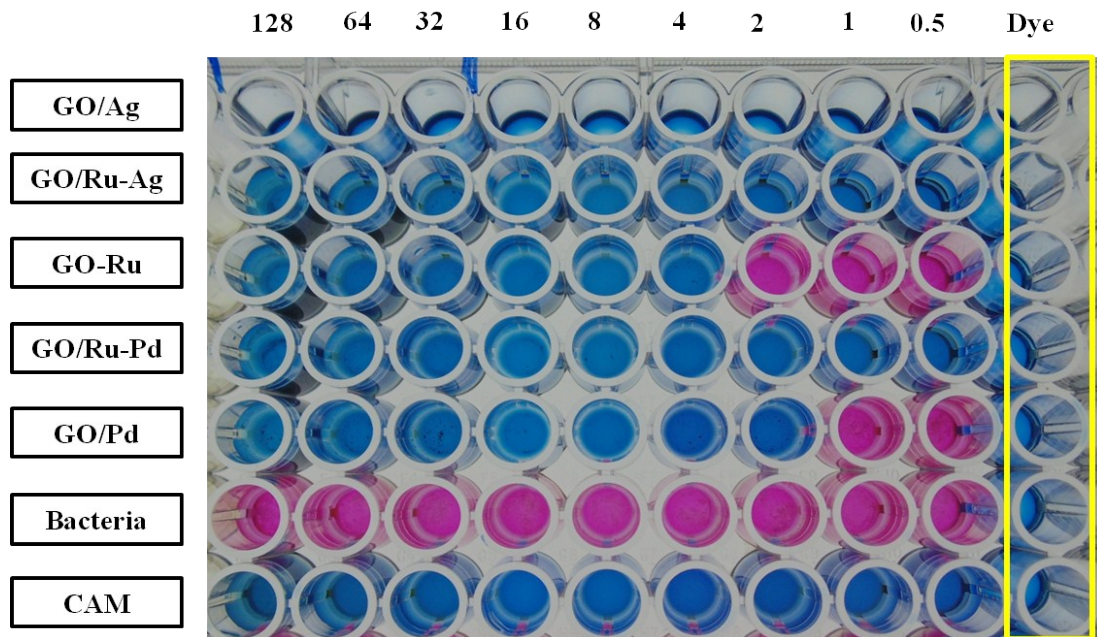

**Fig. 5** Photograph of the Minimum Inhibitory Concentration of GO supported mono and bimetallic NCs against *E. coli*

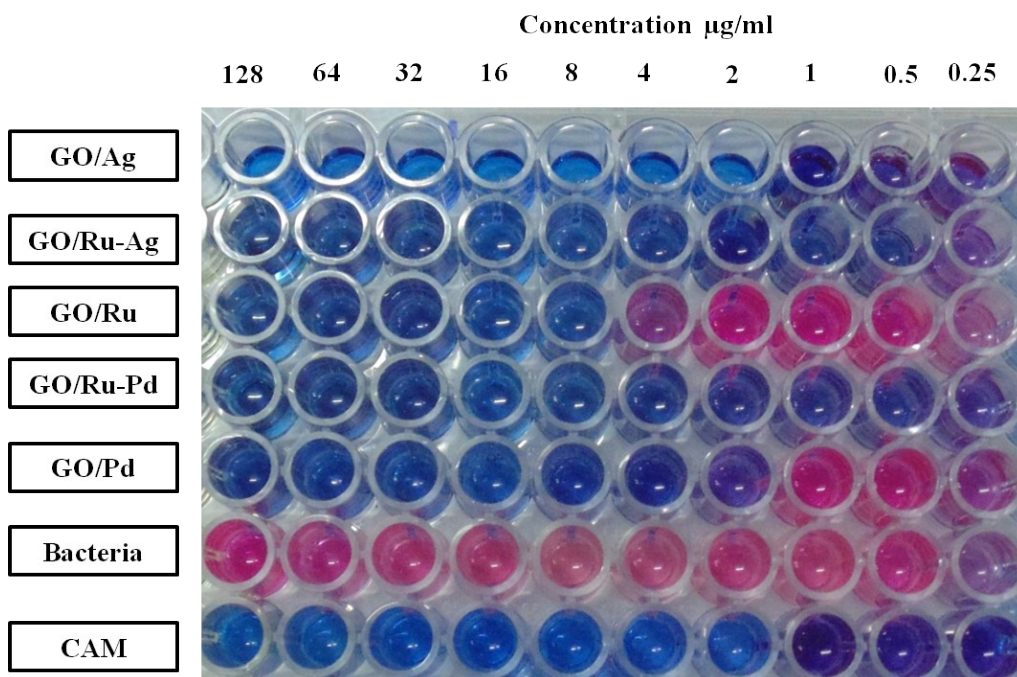

**Fig. 6** Photograph of the Minimum Inhibitory Concentration of GO supported mono and bimetallic NCs against *S. typhi*
